# Supplementary material for: SNPdetector: A Software Tool for Sensitive and Accurate SNP Detection
Source: PubMed Central journal article supplement (PMC1274293; doi:10.1371/journal.pcbi.0010053), 2005-10-28

**Figure s1.** Trace chromatogram of four Cast/Ei animals at Bach1 locus (SNP1 in Table 2). All but the second animal (animal B in Table 2) are heterozygous.

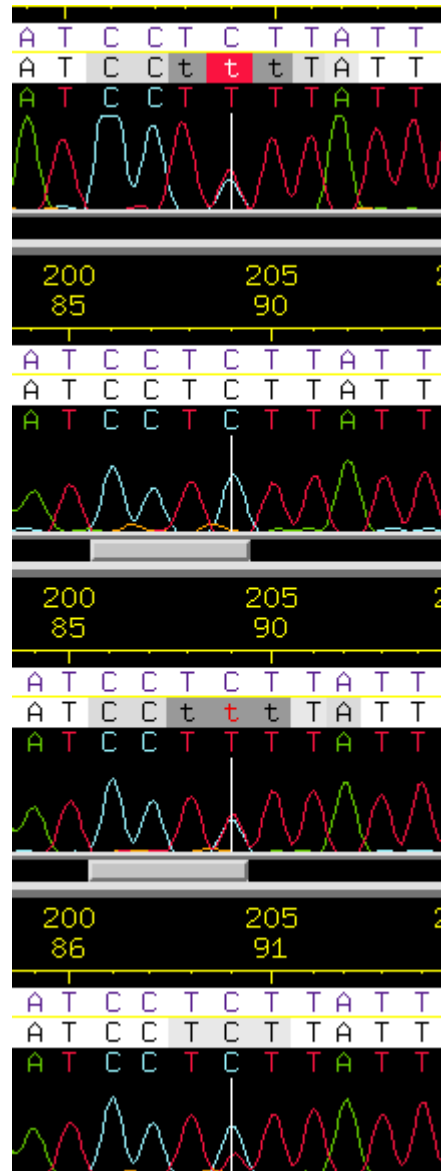

Supplement: pcbi.0010053.sg001.pdf [file pcbi.0010053.sg001.pdf]
